# Supplementary material for: Interaction between Host MicroRNAs and the Gut Microbiota in Colorectal Cancer
Source: PubMed Central journal article supplement (PMC5954203; doi:10.1128/msystems.00205-17), 2018-05-15
Supplement: sys003182230sf3.pdf [file sys003182230sf3.pdf]

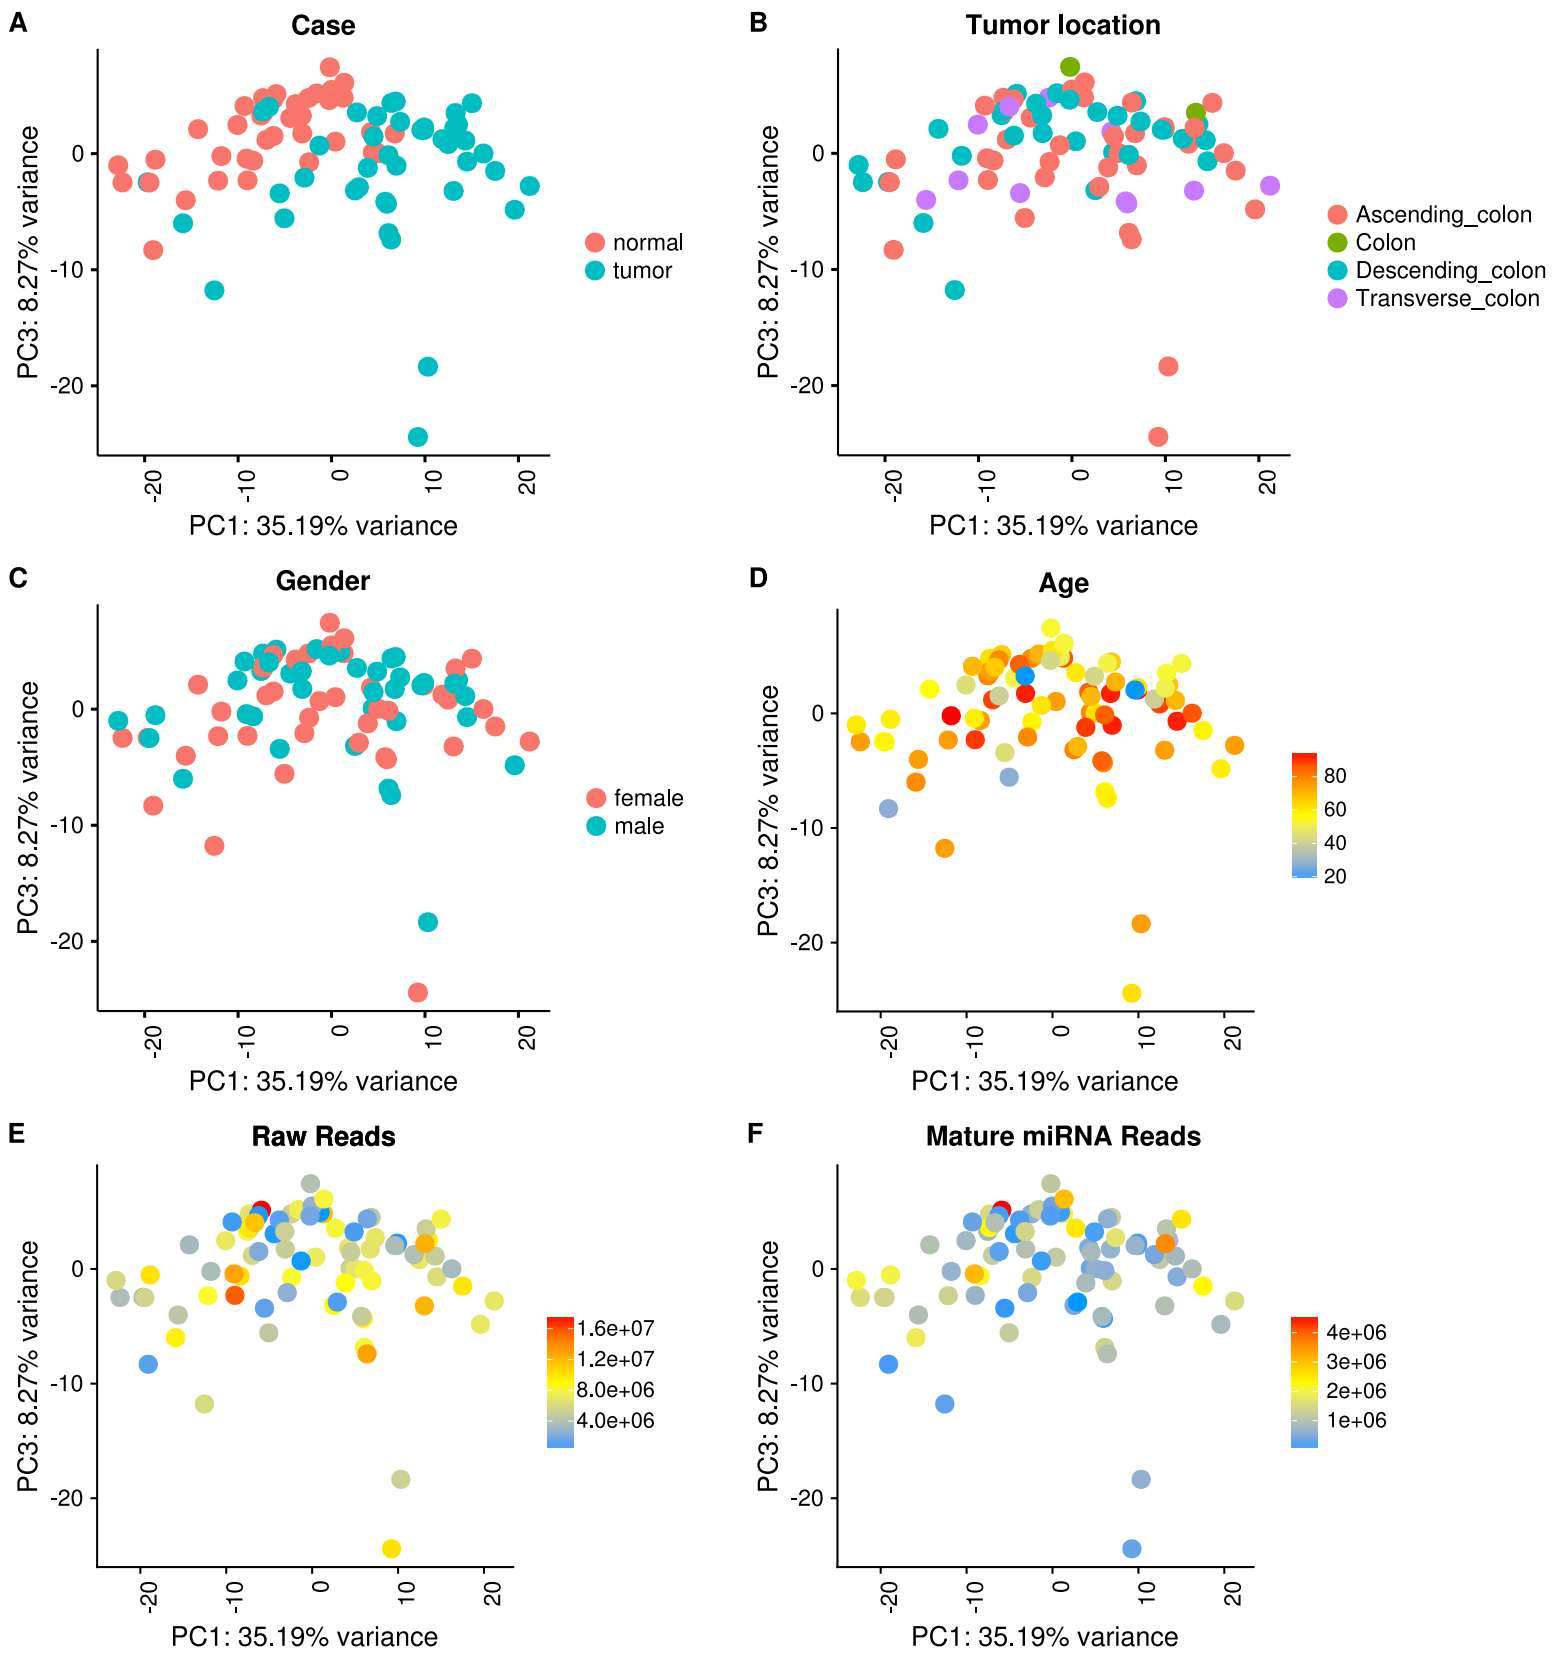

**Supplementary Fig. 3.** Principle Component Analysis (PCA) plot showing PC1 on x-axis and PC3 on y-axis. Each dot was colored by **a.** Case, **b.** Tumor location and **c.** Gender, **d.** Age, **e.** Raw reads and **f.** Mature miRNA Reads.
