# Supplementary material for: Interaction between Host MicroRNAs and the Gut Microbiota in Colorectal Cancer
Source: PubMed Central journal article supplement (PMC5954203; doi:10.1128/msystems.00205-17), 2018-05-15
Supplement: sys003182230sf4.pdf [file sys003182230sf4.pdf]

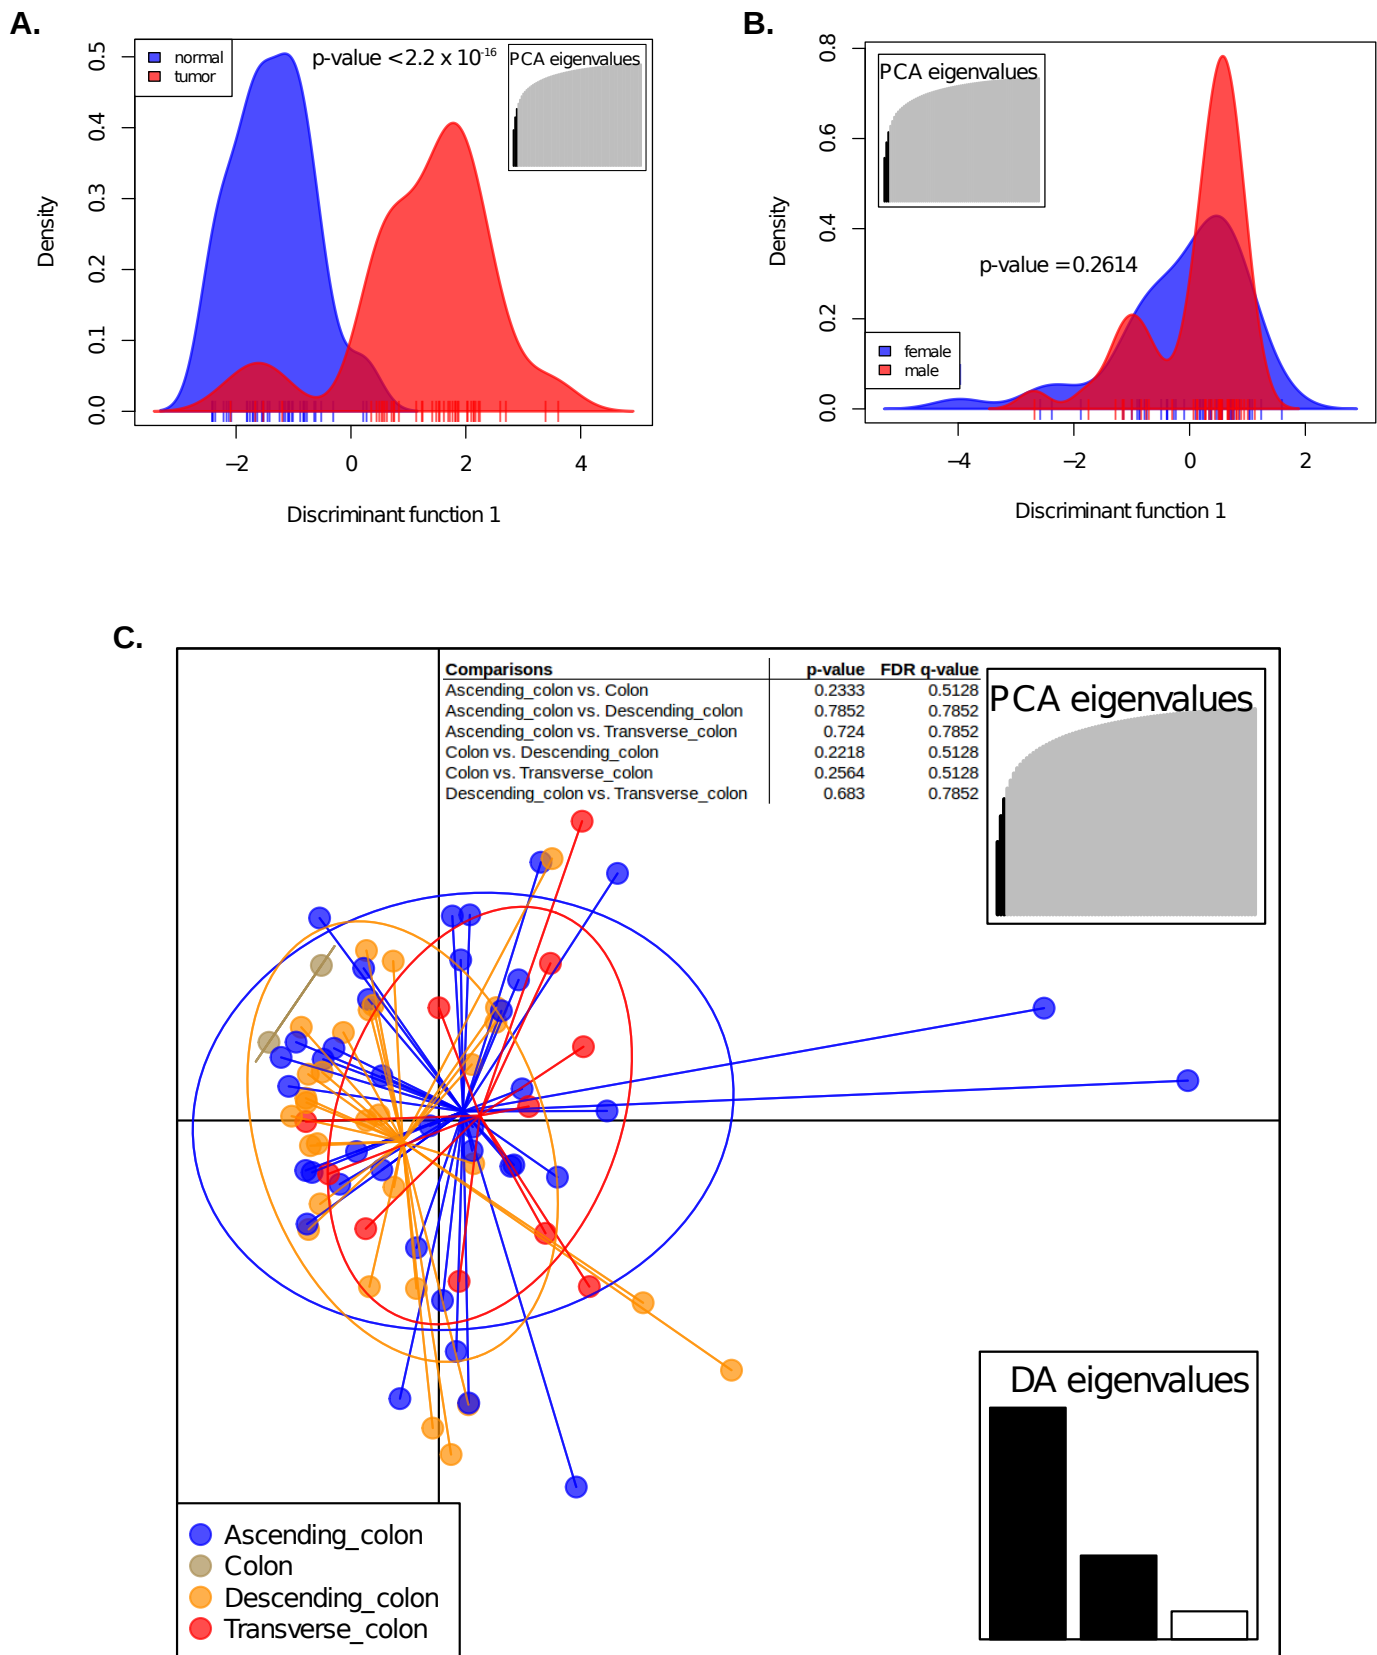

**Supplementary Fig. 4.** Discriminant analysis of principal components (DAPC) using the first 3 principle components. **a.** Case status show a clear separation between the tumor and normal groups. **b.** Genders and **c.** Tumor location do not affect the does not appear to significantly impact the miRNA expression. Statistical significances are tested using two-sample Kolmogorov-Smirnov test, multiple comparisons are adjusted using false discovery rate (FDR) method.
